# Supplementary material for: Seroprevalence of Peste des Petits Ruminants (PPR) and associated risk factors in selected sub-counties of Lyantonde district, South Western Uganda
Source: Research Square preprint supplement (doi:10.21203/rs.3.rs-7463240/v1), 2025-09-18
Supplement: Supplementary file 1 [file eaa364a218119f123a521cf4.docx]

## Supplementary File I: Structured Questionnaire

**SECTION A:** Farm owner/animal caretaker characteristics

| 1. Name: |  |  |
| --- | --- | --- |
| 1. Location (GPS): | Sub county: |  |
|  | Parish: |  |
|  | Village: |  |
| 1. Age: |  |  |
| 1. Occupation: |  |  |
| 1. Marital status: |  |  |
| 1. Education level: |  |  |
| 1. Role on the farm (Choose below) |  |  |
| 1. Owner |  |  |
| 1. Caretaker |  |  |
| 1. Herdsman |  |  |
| 1. Manager |  |  |
| 1. Others |  |  |
| If others, specify |  |  |

**SECTION B: Herd/flock characteristics**

|  | How many animals do you have? (Provide the number) |
| --- | --- |
|  | 1. Sheep |
|  | 1. Goats |
|  | Are there any other animal species on the farm? a) Yes b) No |
|  | If yes, specify |
|  | 1. Cattle |
|  | 1. Pigs |
|  | 1. Poultry |
|  | 1. Others |
|  | Which type of housing do you have for the goats and sheep? |
|  | 1. Raised goat house |
|  | 1. Goat shed |
|  | 1. Goat kraal/Boma |
|  | 1. None |
|  | How do you obtain new animals for stocking on your farm? (Choose all that apply) |
|  | 1. I buy from livestock market |
|  | 1. I buy from fellow farmers/breeders |
|  | 1. Receive as gifts from relatives and friends |
|  | 1. Dowry |
|  | 1. Others (specify) |
|  | What rearing system do you use? |
|  | 1. Paddock grazing |
|  | 1. Free range/extensive grazing |
|  | 1. Tethering |
|  | Do your animals come in contact with other herds/flocks? a) Yes b) No |
|  | If yes, how often? |
|  | 1. Daily |
|  | 1. Weekly |
|  | 1. Monthly |
|  | 1. Rarely |
|  | Do you share grazing or watering grounds with other farmers? |
|  | 1. Yes |
|  | 1. No |
|  | Do you share or lend out breeding males from your farm? |
|  | 1. Yes |
|  | 1. No |
|  | Do nursing goat kids/lambs follow their mothers out to graze? |
|  | 1. Yes |
|  | 1. No |

**SECTION C:** **Individual animal characteristics**

|  | Farm ID | Animal ID | Age | Sex | Species | Breed |
| --- | --- | --- | --- | --- | --- | --- |
| 1. |  |  |  |  |  |  |
| 2. |  |  |  |  |  |  |
| 3. |  |  |  |  |  |  |
| 4. |  |  |  |  |  |  |
| 5. |  |  |  |  |  |  |
| 6. |  |  |  |  |  |  |
| 7. |  |  |  |  |  |  |
| 8. |  |  |  |  |  |  |
| 9. |  |  |  |  |  |  |
| 10. |  |  |  |  |  |  |
| 11. |  |  |  |  |  |  |
| 12. |  |  |  |  |  |  |
| 13. |  |  |  |  |  |  |
| 14. |  |  |  |  |  |  |
| 15. |  |  |  |  |  |  |
